# Supplementary material
Source: publisher figshare collection journal article supplement (https://sage.figshare.com/ndownloader/files/20272617)
Supplement: Supplementary file 1 [file 20272617]

**Supplement 3** – Complications rates according to minor (no requiring surgery) or major (requiring surgery) advents.

| Reference                              | Minor complication                                                                                                                   | Major complication                                          |
|----------------------------------------|--------------------------------------------------------------------------------------------------------------------------------------|-------------------------------------------------------------|
| <b>Astur (2014)</b> <sup>36</sup>      | None                                                                                                                                 | n=3 (9%): arthrofibrosis that required arthroscopic release |
| <b>Buckwalter (2014)</b> <sup>16</sup> | n=5 (38%): n=2 lumbar plexopathy, n=2 quadriceps weakness, n=1 pes anserine bursitis                                                 | None                                                        |
| <b>Ebert (2017)</b> <sup>62</sup>      | n=4 (7%): n=2 wound site opening with or without an associated local infection, n=1 deep vein thrombosis, n=1 postoperative hematoma | None                                                        |
| <b>Emre (2017)</b> <sup>37</sup>       | n=5 (15%): n=5 post-operative hemarthrosis                                                                                           | None                                                        |
| <b>Filardo (2013)</b> <sup>52</sup>    | None                                                                                                                                 | None                                                        |
| <b>Gigante (2009)</b> <sup>58</sup>    | None                                                                                                                                 | None                                                        |
| <b>Gillogly (2014)</b> <sup>54</sup>   | n=1 (4%): n=1 deep vein thrombosis                                                                                                   | None                                                        |
| <b>Kusano (2012)</b> <sup>45</sup>     | n=10 (50%): n=1 post-operative hematoma, n=9 joint stiffness that needed mobilization under anesthesia                               | None                                                        |
| <b>Sadlik (2017)</b> <sup>47</sup>     | None                                                                                                                                 | None                                                        |
| <b>Vanlauwe (2012)</b> <sup>15</sup>   | n=29 (76%): n=18 arthralgia, n=18 joint crepitation, n=9 arthrofibrosis that needed mobilization under anesthesia                    | None                                                        |
